# Supplementary material for: Rare-earth complexes supported by an ansa-bis(amidinate) ligand with a rigid o-phenylene linker: synthesis, structure, and catalytic activity for polymerization of cyclic esters
Source: Royal Society of Chemistry journal article supplement (doi:10.1039/c9dt00365g), 2019-01-01
Supplement: c9dt00365g1.pdf [file c9dt00365g1.pdf]

## Electronic supplementary information for:

# Rare-earth complexes supported by an ansa-bis(amidinate) ligand with a rigid *o*-phenylene linker: synthesis, structure, and catalytic activity for polymerization of cyclic esters

Fenhua Wang,\* Xu Zhao, Xianfu Meng, Shaowu Wang\*

†College of Biological and Chemical Engineering, Anhui Polytechnic University, Wuhu, Anhui 241000, China.

### Supporting Information

|                                                                                                                         |    |
|-------------------------------------------------------------------------------------------------------------------------|----|
| I. Crystallographic datas of complexes.....                                                                             | S2 |
| II. Copies of <sup>1</sup> H NMR, <sup>13</sup> C NMR Spectra of complexes <b>2</b> and <b>4</b> .....                  | S3 |
| III. Copy of <sup>1</sup> H NMR for the ε-CL oligomer prepared from ε-CL using <b>2</b> and <b>4</b> as initiator ..... | S5 |
| IV. Comparison of the calculated molecular weight from the NMR spectrum with the theoretical value .....                | S6 |

## I Crystallographic data of the complexes

**Table S1** Crystallographic data and structure refinement for complexes **2, 3**

| Crustal date                                     | <b>2</b>                                                          | <b>3</b>                                                          |
|--------------------------------------------------|-------------------------------------------------------------------|-------------------------------------------------------------------|
| Empirical formula                                | C <sub>38</sub> H <sub>58</sub> N <sub>5</sub> OSi <sub>2</sub> Y | C <sub>38</sub> H <sub>58</sub> ErN <sub>5</sub> OSi <sub>2</sub> |
| Formula weight                                   | 745.98                                                            | 824.33                                                            |
| Crystal system,                                  | Orthorhombic                                                      | Orthorhombic                                                      |
| Space group                                      | Ama2                                                              | Ama2                                                              |
| a (Å)                                            | 18.4951(17)                                                       | 18.4980(12)                                                       |
| b (Å)                                            | 21.577(2)                                                         | 21.5082(17)                                                       |
| c (Å)                                            | 10.5804(10)                                                       | 10.6134(7)                                                        |
| α (°)                                            | 90.00                                                             | 90.00                                                             |
| β (°)                                            | 90.00                                                             | 90.00                                                             |
| γ (°)                                            | 90.00                                                             | 90.00                                                             |
| V (Å <sup>3</sup> )                              | 4222.3(7)                                                         | 4222.6(5)                                                         |
| T (K)                                            | 293(2)                                                            | 293(2)                                                            |
| D <sub>calc</sub> (g cm <sup>-3</sup> )          | 1.174                                                             | 1.297                                                             |
| μ (mm <sup>-1</sup> )                            | 1.471                                                             | 2.077                                                             |
| Z                                                | 4                                                                 | 4                                                                 |
| F(0 0 0)                                         | 1584                                                              | 1700                                                              |
| Reflections collected/unique                     | 23319/4981                                                        | 23830/4983                                                        |
| R (int)                                          | 0.0513                                                            | 0.0262                                                            |
| Completeness to θ (%)                            | 99.8                                                              | 99.7                                                              |
| λ (Mo Kα radiation) (Å)                          | 0.71073                                                           | 0.71073                                                           |
| θ Range (°)                                      | 1.89- 27.56                                                       | 1.89 to 27.54                                                     |
| GOF                                              | 1.020                                                             | 1.016                                                             |
| R <sub>1</sub> , wR <sub>2</sub> [I > 2σ (I)]    | 0.0469, 0.1059                                                    | 0.0218, 0.0490                                                    |
| R <sub>1</sub> , wR <sub>2</sub> (all data)      | 0.0832, 0.1236                                                    | 0.0278, 0.0511                                                    |
| Largest diff. peak and hole (e Å <sup>-3</sup> ) | 0.305 and -0.344                                                  | 0.501 and -0.307                                                  |

**Table S2** Crystallographic data and structure refinement for complexes **4, 5**

| Crustal date      | <b>4</b>                                                        | <b>5</b>                                                        |
|-------------------|-----------------------------------------------------------------|-----------------------------------------------------------------|
| Empirical formula | C <sub>84</sub> H <sub>96</sub> N <sub>12</sub> La <sub>2</sub> | C <sub>84</sub> H <sub>96</sub> N <sub>12</sub> Nd <sub>2</sub> |
| Formula weight    | 1551.54                                                         | 1562.20                                                         |
| Crystal system,   | Monoclinic                                                      | Monoclinic                                                      |
| Space group       | P2 <sub>1</sub> /n                                              | P2 <sub>1</sub> /c                                              |
| a (Å)             | 13.0485(12)                                                     | 12.9980(5)                                                      |
| b (Å)             | 19.6899(18)                                                     | 19.4421(7)                                                      |
| c (Å)             | 31.006(3)                                                       | 31.006(3)                                                       |
| α (°)             | 90.00                                                           | 90.00                                                           |
| β (°)             | 91.50                                                           | 112.1490(10)°                                                   |
| γ (°)             | 90.00                                                           | 90.00                                                           |

|                                                     |                 |                  |
|-----------------------------------------------------|-----------------|------------------|
| V (Å <sup>3</sup> )                                 | 7963.5(13)      | 7761.2(5)        |
| T (K)                                               | 293(2)          | 293(2)           |
| D <sub>calc</sub> (g cm <sup>-3</sup> )             | 1.294           | 1.337            |
| μ (mm <sup>-1</sup> )                               | 1.108           | 1.374            |
| Z                                                   | 4               | 4                |
| F(0 0 0)                                            | 3192            | 3216             |
| Reflections<br>collected/unique                     | 79888/14535     | 69681/17852      |
| R (int)                                             | 0.0586          | 0.0929           |
| Completeness to θ (%)                               | 99.7            | 99.9             |
| λ (Mo Kα radiation) (Å)                             | 0.71073         | 0.71073          |
| θ Range (°)                                         | 1.225- 25.344   | 2.197-27.554     |
| GOF                                                 | 1.092           | 1.029            |
| R <sub>1</sub> , wR <sub>2</sub> [I > 2σ (I)]       | 0.0582, 0.1246  | 0.0535, 0.1301   |
| R <sub>1</sub> , wR <sub>2</sub> (all data)         | 0.0873, 0.1378  | 0.0801, 0.1452   |
| Largest diff. peak and<br>hole (e Å <sup>-3</sup> ) | 1.339 and 1.065 | 2.279 and -1.729 |

## II Copies of <sup>1</sup>H NMR, <sup>13</sup>C NMR Spectra of the complex **2**

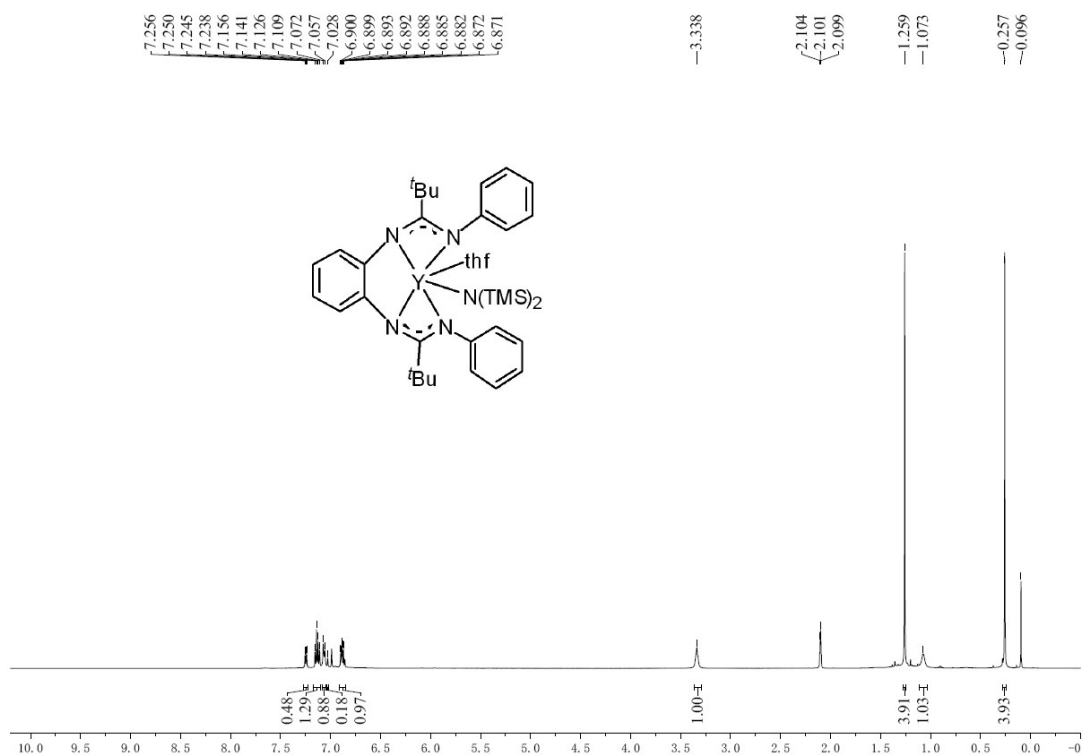

Figure S1. <sup>1</sup>H NMR spectrum (500 MHz, C<sub>7</sub>D<sub>8</sub>, 298 K) of the complex **2**

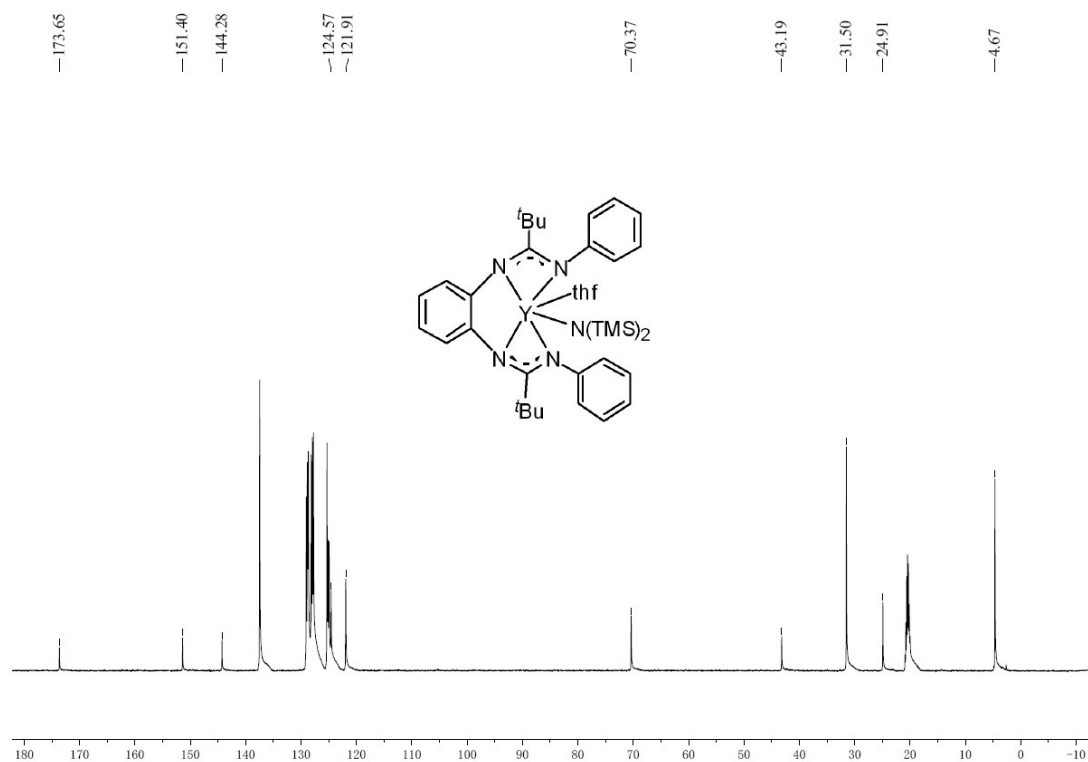

Figure S2. <sup>13</sup>C NMR spectrum (125 MHz, C<sub>7</sub>D<sub>8</sub>, 298 K) of the complex **2**

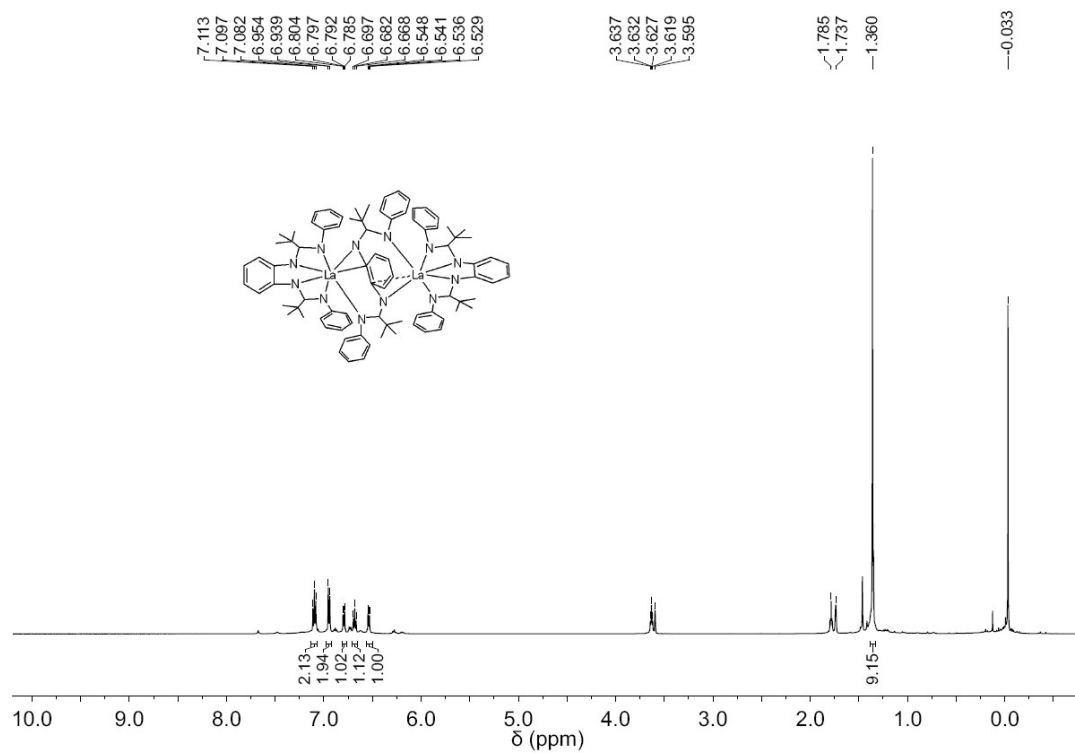

Figure S3. <sup>1</sup>H NMR spectrum (500 MHz, C<sub>4</sub>D<sub>8</sub>O, 298 K) of the complex **4**

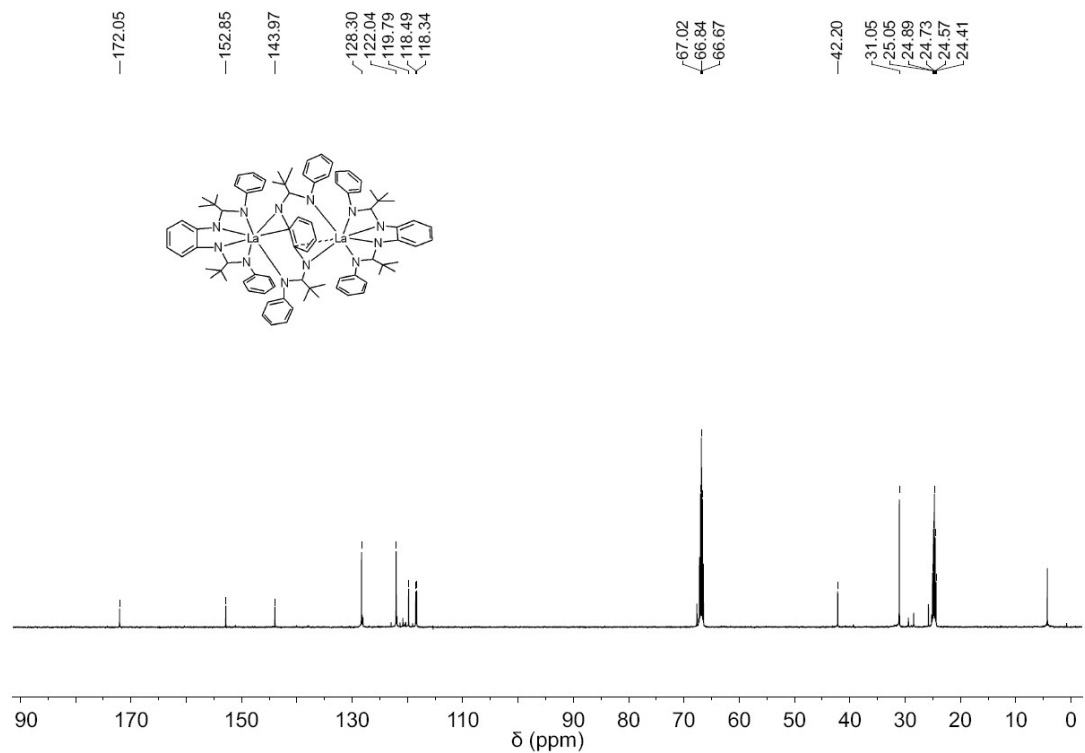

Figure S4.  $^{13}\text{C}$  NMR spectrum (125 MHz,  $\text{C}_4\text{D}_8\text{O}$ , 298 K) of the complex 4

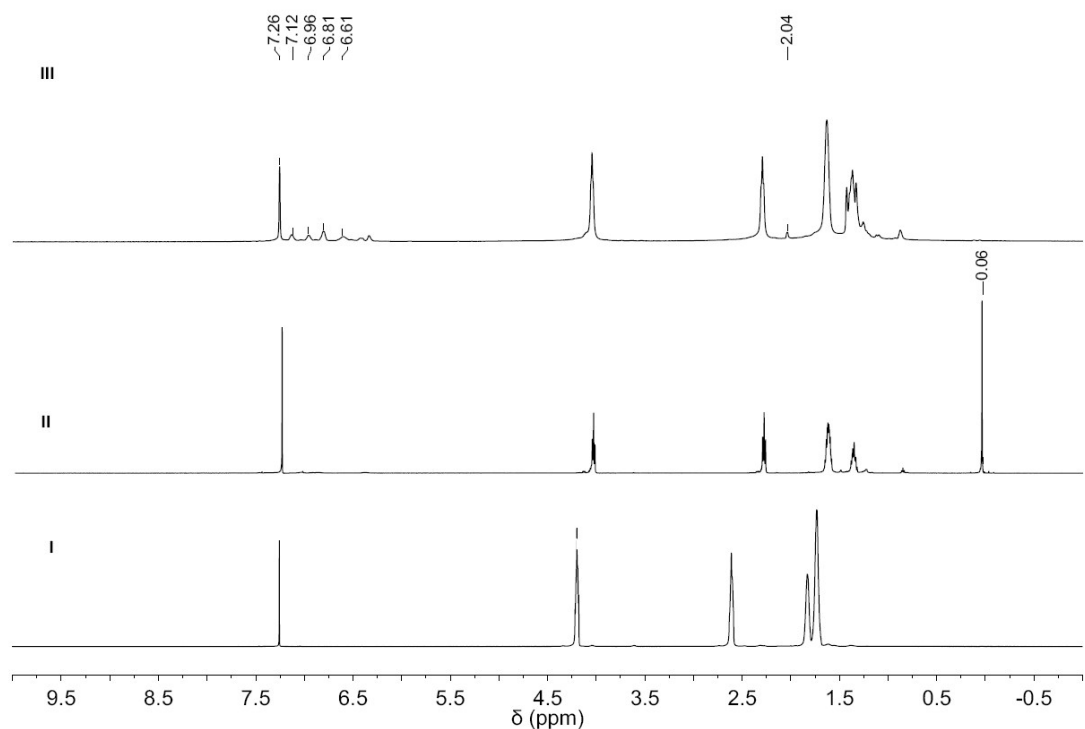

Figure S5.  $^1\text{H}$  NMR spectra ( $\text{CDCl}_3$  without TMS, 500 MHz) of (I)  $\epsilon\text{-CL}$ ; (II) the oligomer of  $\epsilon\text{-CL}$  obtained using complex **2** as initiator ( $[\epsilon\text{-CL}]/[\mathbf{2}] = 20$ , in toluene, room temperature; (III) the oligomer of  $\epsilon\text{-CL}$  obtained using complex **4** as initiator ( $[\epsilon\text{-CL}]/[\mathbf{4}] = 20$ , in toluene, room temperature).

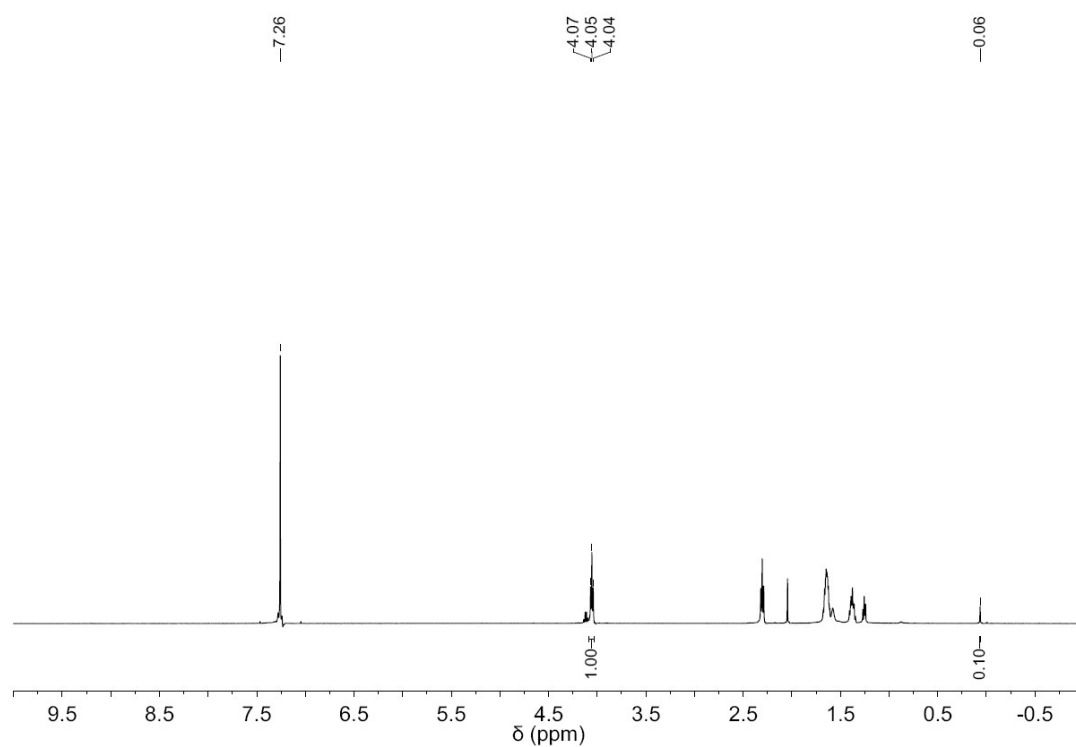

Figure S6. <sup>1</sup>H NMR spectra (CDCl<sub>3</sub> without TMS, 500 MHz) of ε-CL under [ε-CL]/[**2**] = 100:1. From the NMR spectrum, it was found that integral ratio of CH<sub>2</sub> : N(SiMe<sub>3</sub>)<sub>2</sub> = 10:1, the number of H atoms of CH<sub>2</sub> : N(SiMe<sub>3</sub>)<sub>2</sub> = 1:9, the calculated molecular weight is 10260 g.mol<sup>-1</sup>. The theoretical value may be 11400 g.mol<sup>-1</sup>. So, the calculated molecular weight is in good agreement with the theoretical value.
